# Supplementary material
Source: PubMed Central journal article supplement (PMC8299914)
Supplement: NIHMS1650496-supplement-Author_correction_to_include_authors.pdf [file NIHMS1650496-supplement-Author_correction_to_include_authors.pdf]

## Author Correction: $\gamma\delta$ T cells producing interleukin-17A regulate adipose regulatory T cell homeostasis and thermogenesis

Ayano C. Kohlgruber, Shani T. Gal-Oz, Nelson M. LaMarche, Moto Shimazaki, Danielle Duquette, Hui-Fern Koay, Hung N. Nguyen, Amir I. Mina , Tyler Paras, Ali Tavakkoli, Ulrich von Andrian , Adam P. Uldrich, Dale I. Godfrey, Alexander S. Banks , Tal Shay , Michael B. Brenner  and Lydia Lynch 

In the version of this article initially published, three authors (Hui-Fern Kuoy, Adam P. Uldrich and Dale I. Godfrey) and their affiliations, acknowledgments and contributions were not included. The correct information is as follows:

Ayano C. Kohlgruber<sup>1,2</sup>, Shani T. Gal-Oz<sup>3</sup>, Nelson M. LaMarche<sup>1,2</sup>, Moto Shimazaki<sup>1</sup>, Danielle Duquette<sup>4</sup>, Hui-Fern Koay<sup>5,6</sup>, Hung N. Nguyen<sup>1</sup>, Amir I. Mina<sup>4</sup>, Tyler Paras<sup>1</sup>, Ali Tavakkoli<sup>7</sup>, Ulrich von Andrian<sup>2,8</sup>, Adam P. Uldrich<sup>5,6</sup>, Dale I. Godfrey<sup>5,6</sup>, Alexander S. Banks<sup>4</sup>, Tal Shay<sup>3</sup>, Michael B. Brenner<sup>1,10\*</sup> and Lydia Lynch<sup>1,4,9,10\*</sup>

<sup>1</sup>Division of Rheumatology, Immunology and Allergy, Brigham and Women's Hospital, Boston, MA, USA. <sup>2</sup>Division of Medical Sciences, Harvard Medical School, Boston, MA, USA. <sup>3</sup>Department of Life Sciences, Ben-Gurion University of the Negev, Beersheba, Israel. <sup>4</sup>Division of Endocrinology, Department of Medicine, Brigham and Women's Hospital, Boston, MA, USA. <sup>5</sup>Department of Microbiology and Immunology, Peter Doherty Institute for Infection and Immunity, University of Melbourne, Parkville, Australia. <sup>6</sup>ARC Centre of Excellence in Advanced Molecular Imaging, University of Melbourne, Parkville, Australia. <sup>7</sup>Department of General and Gastrointestinal Surgery, Brigham and Women's Hospital, Boston, MA, USA. <sup>8</sup>Department of Microbiology and Immunology, Harvard Medical School, Boston, MA, USA. <sup>9</sup>School of Biochemistry and Immunology, Trinity College, Dublin, Ireland. <sup>10</sup>These authors jointly supervised this work: Michael B. Brenner, Lydia Lynch. \*e-mail: mbrenner@research.bwh.harvard.edu; llynch@bwh.harvard.edu

### Acknowledgements

We thank A.T. Chicoine, flow cytometry core manager at the Human Immunology Center at BWH, for flow cytometry sorting. We thank D. Sant'Angelo (Rutgers Cancer Institute) for providing *Zbtb16*<sup>-/-</sup> mice and R. O'Brien (National Jewish Health) for providing *Vg4/6*<sup>-/-</sup> mice. Supported by NIH grant R01 AI11304603 (to M.B.B.), ERC Starting Grant 679173 (to L.L.), the National Health and Medical Research Council of Australia (1013667), an Australian Research Council Future Fellowship (FT140100278 for A.P.U.) and a National Health and Medical Research Council of Australia Senior Principal Research Fellowship (1117766 for D.I.G.).

### Author contributions

A.C.K., L.L., and M.B.B. conceived and designed the experiments, and wrote the manuscript. A.C.K., N.M.L., L.L., H.N.N., M.S., T.P., and D.D. performed the experiments. S.T.G.-O. and T.S. performed the RNA-seq analysis. A.S.B. and A.I.M. provided advice and performed the CLAMS experiments. A.T. provided human bariatric patient samples. Parabiosis experiments were performed in the laboratory of U.v.A. H.-F.K., A.P.U. and D.I.G. provided critical insight into the TCR chain usage of PLZF<sup>+</sup>  $\gamma\delta$  T cells. M.B.B., N.M.L., and L.L. critically reviewed the manuscript.

The errors have been corrected in the HTML and PDF version of the article.

Correction to: *Nature Immunology* doi:10.1038/s41590-018-0094-2 (2018), published online 18 April 2018.

Published online: 7 February 2019

<https://doi.org/10.1038/s41590-019-0330-4>

## Author Correction: Progression of whole-blood transcriptional signatures from interferon-induced to neutrophil-associated patterns in severe influenza

Jake Dunning, Simon Blankley , Long T. Hoang , Mike Cox , Christine M. Graham, Philip L. James, Chloe I. Bloom, Damien Chaussabel, Jacques Banchereau , Stephen J. Brett , MOSAIC Investigators, Miriam F. Moffatt, Anne O'Garra  and Peter J. M. Openshaw 

Correction to: *Nature Immunology* <https://doi.org/10.1038/s41590-018-0111-5> (2018), published online 18 May 2018.

In the version of this article initially published, a source of funding was not included in the Acknowledgements section. That section should include the following: P.J.M.O. was supported by EU FP7 PREPARE project 602525. The error has been corrected in the HTML and PDF version of the article.

Published online: 7 February 2019

<https://doi.org/10.1038/s41590-019-0328-y>
