# Supplementary material
Source: PubMed Central journal article supplement (PMC8299914)
Supplement: NIHMS1650496-supplement-Supplementary_Figures_and_tables.pdf [file NIHMS1650496-supplement-Supplementary_Figures_and_tables.pdf]

In the format provided by the authors and unedited.

# $\gamma\delta$ T cells producing interleukin-17A regulate adipose regulatory T cell homeostasis and thermogenesis

Ayano C. Kohlgruber<sup>1,2</sup>, Shani T. Gal-Oz<sup>3</sup>, Nelson M. LaMarche<sup>1,2</sup>, Moto Shimazaki<sup>1</sup>, Danielle Duquette<sup>4</sup>, Hui-Fern Koay<sup>5,6</sup>, Hung N. Nguyen<sup>1</sup>, Amir I. Mina <sup>4</sup>, Tyler Paras<sup>1</sup>, Ali Tavakkoli<sup>7</sup>, Ulrich von Andrian <sup>2,8</sup>, Adam P. Uldrich<sup>5,6</sup>, Dale I. Godfrey<sup>5,6</sup>, Alexander S. Banks <sup>4</sup>, Tal Shay <sup>3</sup>, Michael B. Brenner <sup>1,10\*</sup> and Lydia Lynch <sup>1,4,9,10\*</sup>

<sup>1</sup>Division of Rheumatology, Immunology and Allergy, Brigham and Women's Hospital, Boston, MA, USA. <sup>2</sup>Division of Medical Sciences, Harvard Medical School, Boston, MA, USA. <sup>3</sup>Department of Life Sciences, Ben-Gurion University of the Negev, Beersheba, Israel. <sup>4</sup>Division of Endocrinology, Department of Medicine, Brigham and Women's Hospital, Boston, MA, USA. <sup>5</sup>Department of Microbiology and Immunology, Peter Doherty Institute for Infection and Immunity, University of Melbourne, Parkville, Australia. <sup>6</sup>ARC Centre of Excellence in Advanced Molecular Imaging, University of Melbourne, Parkville, Australia. <sup>7</sup>Department of General and Gastrointestinal Surgery, Brigham and Women's Hospital, Boston, MA, USA. <sup>8</sup>Department of Microbiology and Immunology, Harvard Medical School, Boston, MA, USA. <sup>9</sup>School of Biochemistry and Immunology, Trinity College, Dublin, Ireland. <sup>10</sup>These authors jointly supervised this work: Michael B. Brenner and Lydia Lynch. \*e-mail: [mbrenner@research.bwh.harvard.edu](mailto:mbrenner@research.bwh.harvard.edu); [llynch@bwh.harvard.edu](mailto:llynch@bwh.harvard.edu)

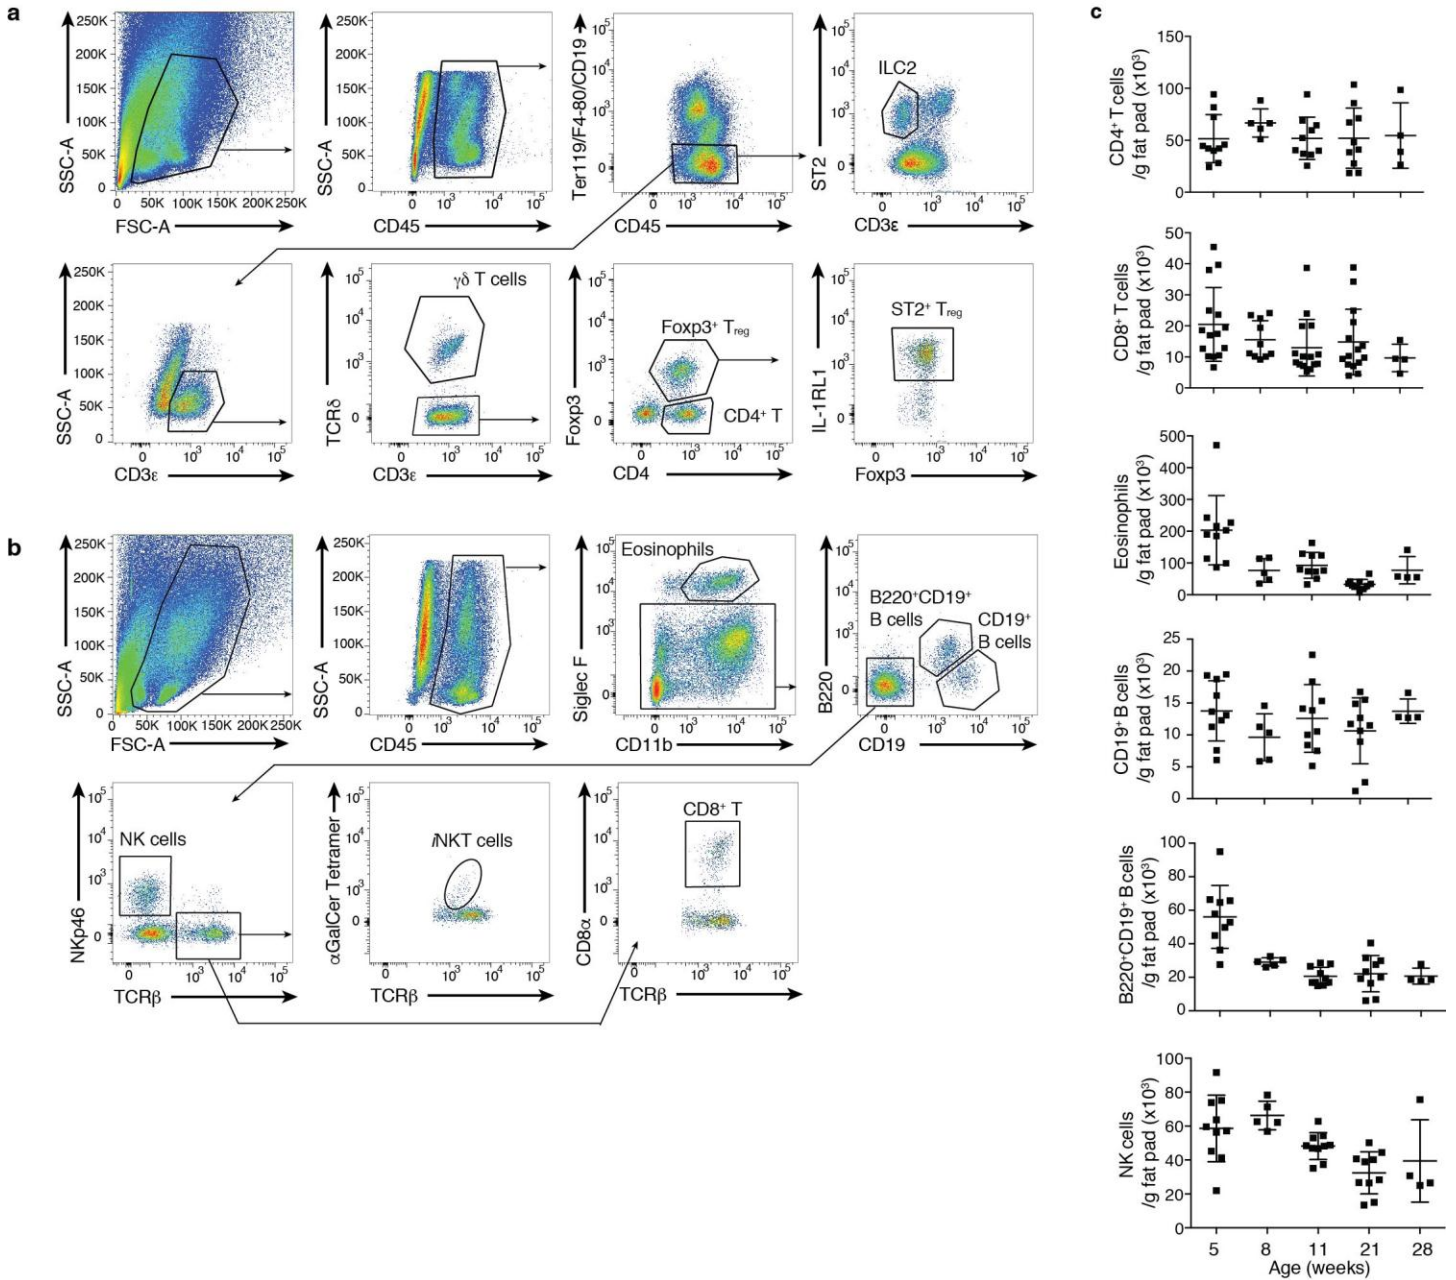

### Supplementary Figure 1

Immunophenotyping panels for adipose immune-cell quantification

(a) Representative flow cytometry plots to identify ILC2s,  $\gamma\delta$  T, CD4<sup>+</sup> T, Foxp3<sup>+</sup> T<sub>reg</sub>, and ST2<sup>+</sup>Foxp3<sup>+</sup> T<sub>reg</sub> cells. (b) Representative flow cytometry plots to identify eosinophils, B220<sup>+</sup>CD19<sup>+</sup> B, CD19<sup>+</sup> B, NK, iNKT, and CD8<sup>+</sup> T cells. (c) Numbers of CD4<sup>+</sup> T, CD8<sup>+</sup> T, eosinophils, CD19<sup>+</sup> B, B220<sup>+</sup>CD19<sup>+</sup> B, and NK cells per gram of eWAT at 5, 8, 11, 21 and 28 wks of age in male mice ( $n = 5$ , pooled). Each symbol represents an individual mouse; small horizontal lines indicate the mean. Data are representative across two experiments (a,b,c; mean  $\pm$  s.e.m. in c).

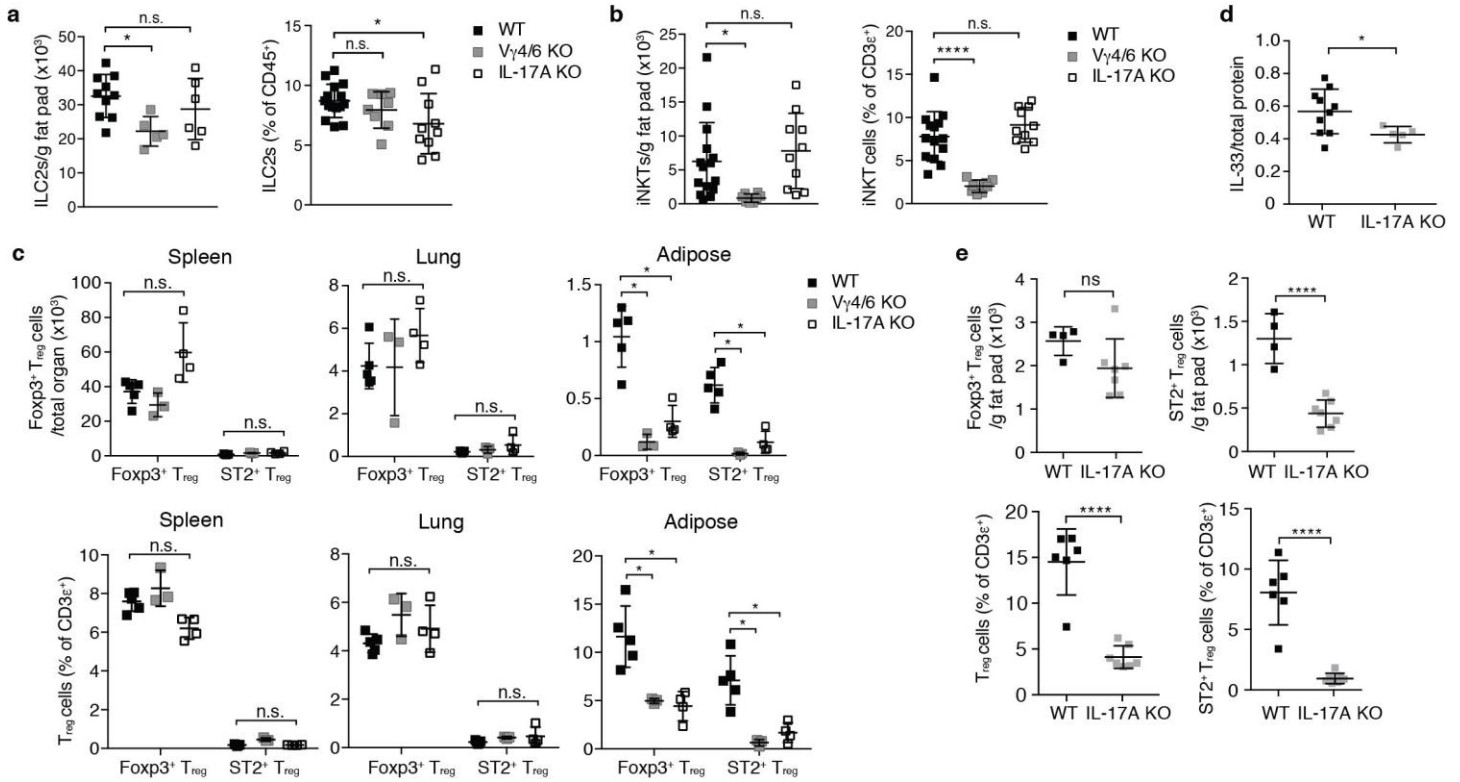

### Supplementary Figure 2

ILC2, iNKT, and T<sub>reg</sub> numbers in IL-17A-knockout and V $\gamma$ 4/6-knockout mice

(a) Numbers (left) and frequency (right) of ILC2s in eWAT from WT, *Vg4/6*<sup>-/-</sup> and *Il17a*<sup>-/-</sup> 16 wk old mice ( $n = 5$ , pooled). (b) Numbers (left) and frequency (right) of iNKTs in eWAT from WT, *Vg4/6*<sup>-/-</sup> and *Il17a*<sup>-/-</sup> 16 wk old mice ( $n = 5$ , pooled). (c) Quantification of numbers (top) and frequencies (bottom) of T<sub>reg</sub> cells and ST2<sup>+</sup> T<sub>reg</sub> cells from spleen, lung, and adipose tissue from WT, *Vg4/6*<sup>-/-</sup> and *Il17a*<sup>-/-</sup> 16 wk old mice ( $n \geq 3$ ). (d) IL-33 protein from SVF eWAT lysates of 11 wk male WT and *Il17a*<sup>-/-</sup> mice normalized to total SVF protein by ELISA ( $n \geq 3$ ). (e) Numbers (top) and frequency (bottom) of T<sub>reg</sub> cells and ST2<sup>+</sup> T<sub>reg</sub> cells from WT and *Il17a*<sup>-/-</sup> eWAT at 11 wks of age ( $n \geq 4$ ). Each symbol represents an individual mouse; small horizontal lines indicate the mean. NS, not significant ( $P > 0.05$ ); \*  $P < 0.05$ ; \*\*\*\*  $P < 0.0001$  (One-way ANOVA in a-c; Student's  $t$  test in d-e). Data are pooled across two experiments (a-e; mean  $\pm$  s.e.m. in a-e).

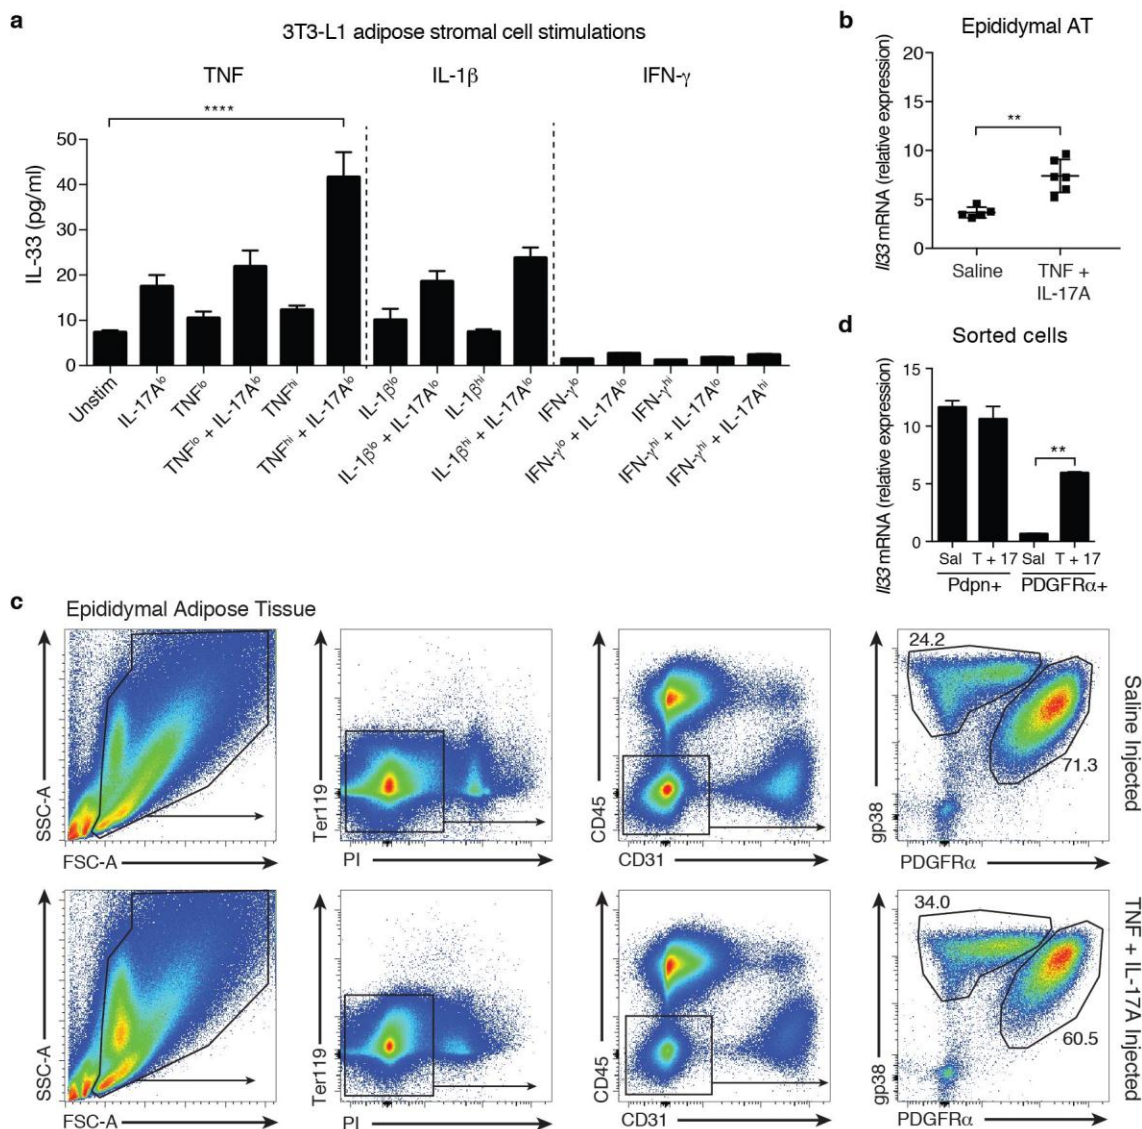

### Supplementary Figure 3

In vitro and in vivo cytokine stimulations of epididymal adipose stromal cells

(a) 3T3L1 adipose fibroblasts were unstimulated (unstim) or stimulated with  $\text{TNF}^{\text{lo}}$  (0.1ng/mL),  $\text{TNF}^{\text{hi}}$  (1ng/mL),  $\text{IL-17A}^{\text{lo}}$  (0.1ng/mL),  $\text{IL-17A}^{\text{hi}}$  (1ng/mL),  $\text{IL-1}\beta^{\text{lo}}$  (0.1ng/mL),  $\text{IL-1}\beta^{\text{hi}}$  (1ng/mL),  $\text{IFN-}\gamma^{\text{lo}}$  (0.1ng/mL),  $\text{IFN-}\gamma^{\text{hi}}$  (1ng/mL), or a combination of the cytokines as indicated for 18h. IL-33 protein was measured by ELISA. (b) WT mice were injected with saline or TNF (1  $\mu\text{g}$ ) and IL-17A (0.5  $\mu\text{g}$ ) every third day for a total of nine days and eWAT RNA isolated. *//33* transcript levels were measured by quantitative real-time PCR and normalized to *Tbp* ( $n \geq 5$ ). Representative flow cytometry plots (c) and *//33* expression from iWAT stromal cells (d) after WT mice were injected with saline or TNF (1  $\mu\text{g}$ ) and IL-17A (0.5  $\mu\text{g}$ ) every third day for a total of nine days. *//33* normalized with *Tbp* ( $n \geq 3$ , pooled). Small horizontal lines indicate the mean. \*\*  $P < 0.01$ ; \*\*\*\*  $P < 0.0001$  (One-way ANOVA in a,d; Student's *t* test in b). Data are pooled across two experiments run in triplicates (a; mean  $\pm$  s.e.m. in a). Data are representative of two experiments (b-d; mean  $\pm$  s.e.m. in b,d).

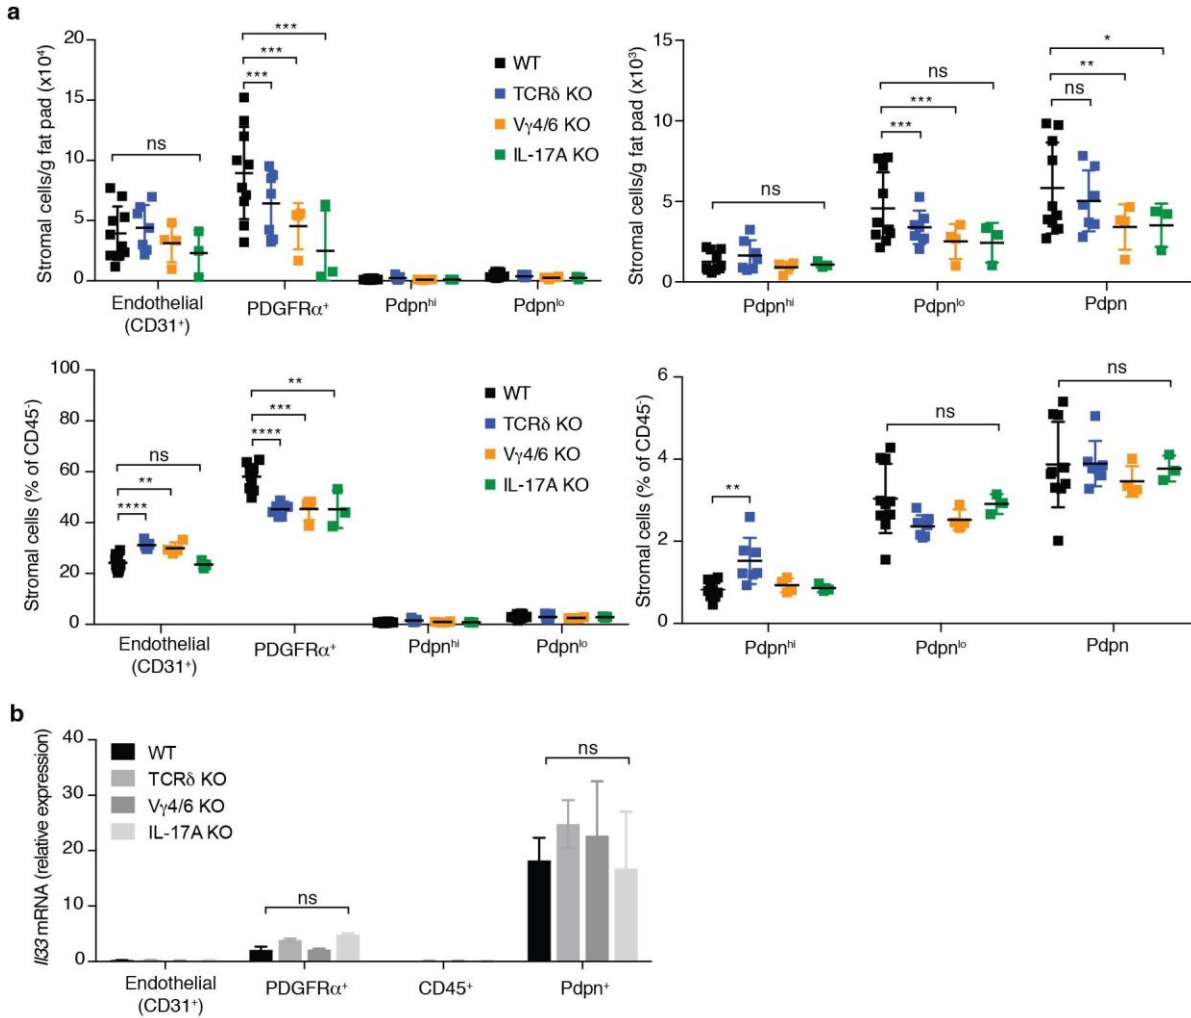

#### Supplementary Figure 4

Decreased numbers, and not gene expression, probably contribute to lower IL-33 protein

(a) Quantification of numbers (top) and frequencies (bottom) of CD31<sup>+</sup>, PDGFR $\alpha^+$ Pdpn<sup>-</sup>, Pdpn<sup>hi</sup>, and Pdpn<sup>lo</sup> eWAT stromal cells from 23 wk old WT, *Tcrd*<sup>-/-</sup>, *Vg4/6*<sup>-/-</sup>, and *Il17a*<sup>-/-</sup> male mice ( $n \geq 3$  mice per genotype). (b) Quantitative real-time PCR for *Il33* expression normalized with *Tbp* from sorted Pdpn<sup>hi</sup>, PDGFR $\alpha^+$ , CD31<sup>+</sup>, and CD45<sup>+</sup> cells from WT, *Tcrd*<sup>-/-</sup>, *Vg4/6*<sup>-/-</sup>, and *Il17a*<sup>-/-</sup> mice ( $n \geq 3$  mice per genotype). Each symbol represents an individual mouse; small horizontal lines indicate the mean. NS, not significant ( $P > 0.05$ ); \*  $P < 0.05$ ; \*\*  $P < 0.01$ ; \*\*\*  $P < 0.001$ ; \*\*\*\*  $P < 0.0001$ . (One-way ANOVA in a-b). Data are representative of two experiments (a-b; mean  $\pm$  s.e.m. in a-b).

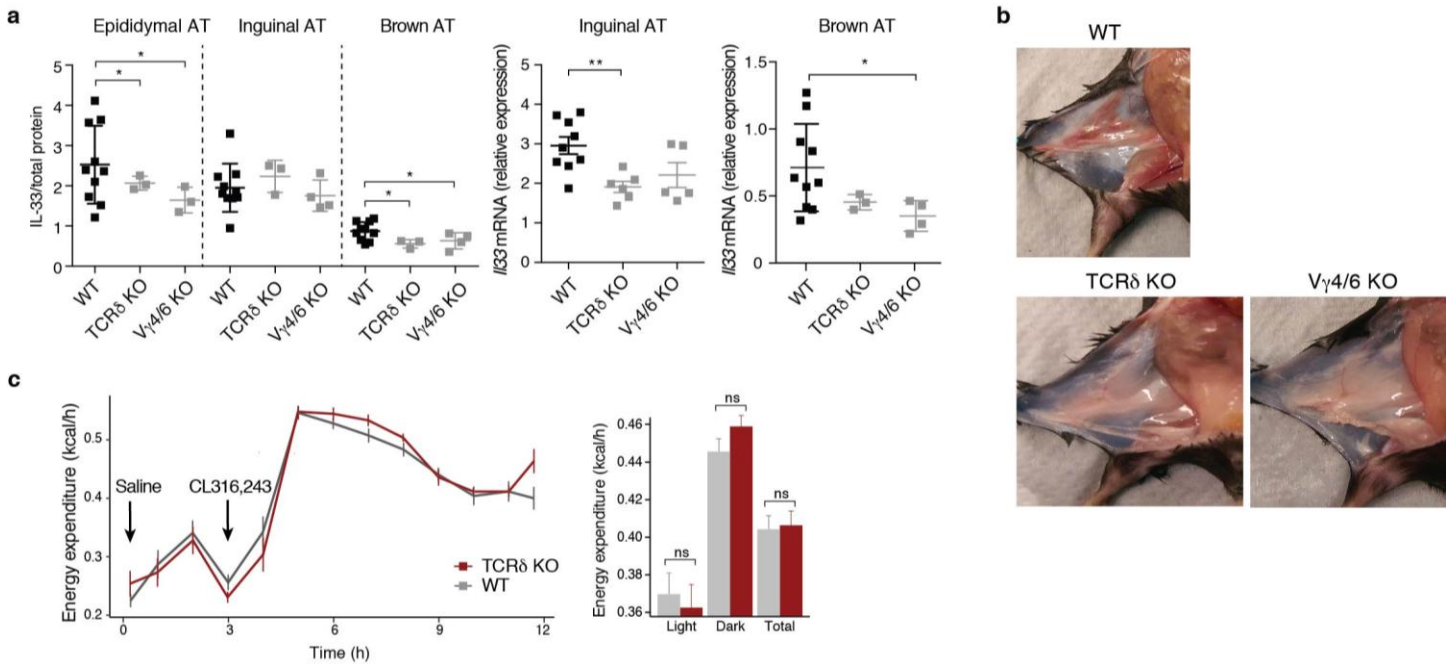

### Supplementary Figure 5

$\gamma\delta$  T cells promote temperature regulation and IL-33 homeostasis in BAT and iWAT

(a) IL-33 protein was quantified from cell lysates of eWAT, iWAT, and BAT from WT, *Tcrδ*<sup>-/-</sup> and *Vγ4/6*<sup>-/-</sup> mice using ELISA (left). Quantitative real-time PCR for *I/33* expression normalized with *Tbp* (right) from iWAT and BAT of WT, *Tcrδ*<sup>-/-</sup> and *Vγ4/6*<sup>-/-</sup> mice ( $n \geq 4$ ). (b) Representative gross anatomy of iWAT from 22 wk old WT, *Tcrδ*<sup>-/-</sup> and *Vγ4/6*<sup>-/-</sup> mice after 6 h at 4 °C. (c) Energy expenditure measured from WT and *Tcrδ*<sup>-/-</sup> mice injected with sterile saline at time 0 h and subsequently injected with selective  $\beta$ 3-adrenergic receptor, CL-316 243, (1mg/kg) at 3 h ( $n = 5$  per genotype). Small horizontal lines indicate the mean. NS, not significant; \*  $P < 0.05$ ; \*\*  $P < 0.01$ ; \*\*\*  $P < 0.001$ . (One-way ANOVA in a; Metabolic variable adjusted for differences in body composition by ANCOVA in c). Data are representative of two experiments (a,b; mean  $\pm$  s.e.m. in a) or one experiment (c; mean  $\pm$  s.e.m. in c).

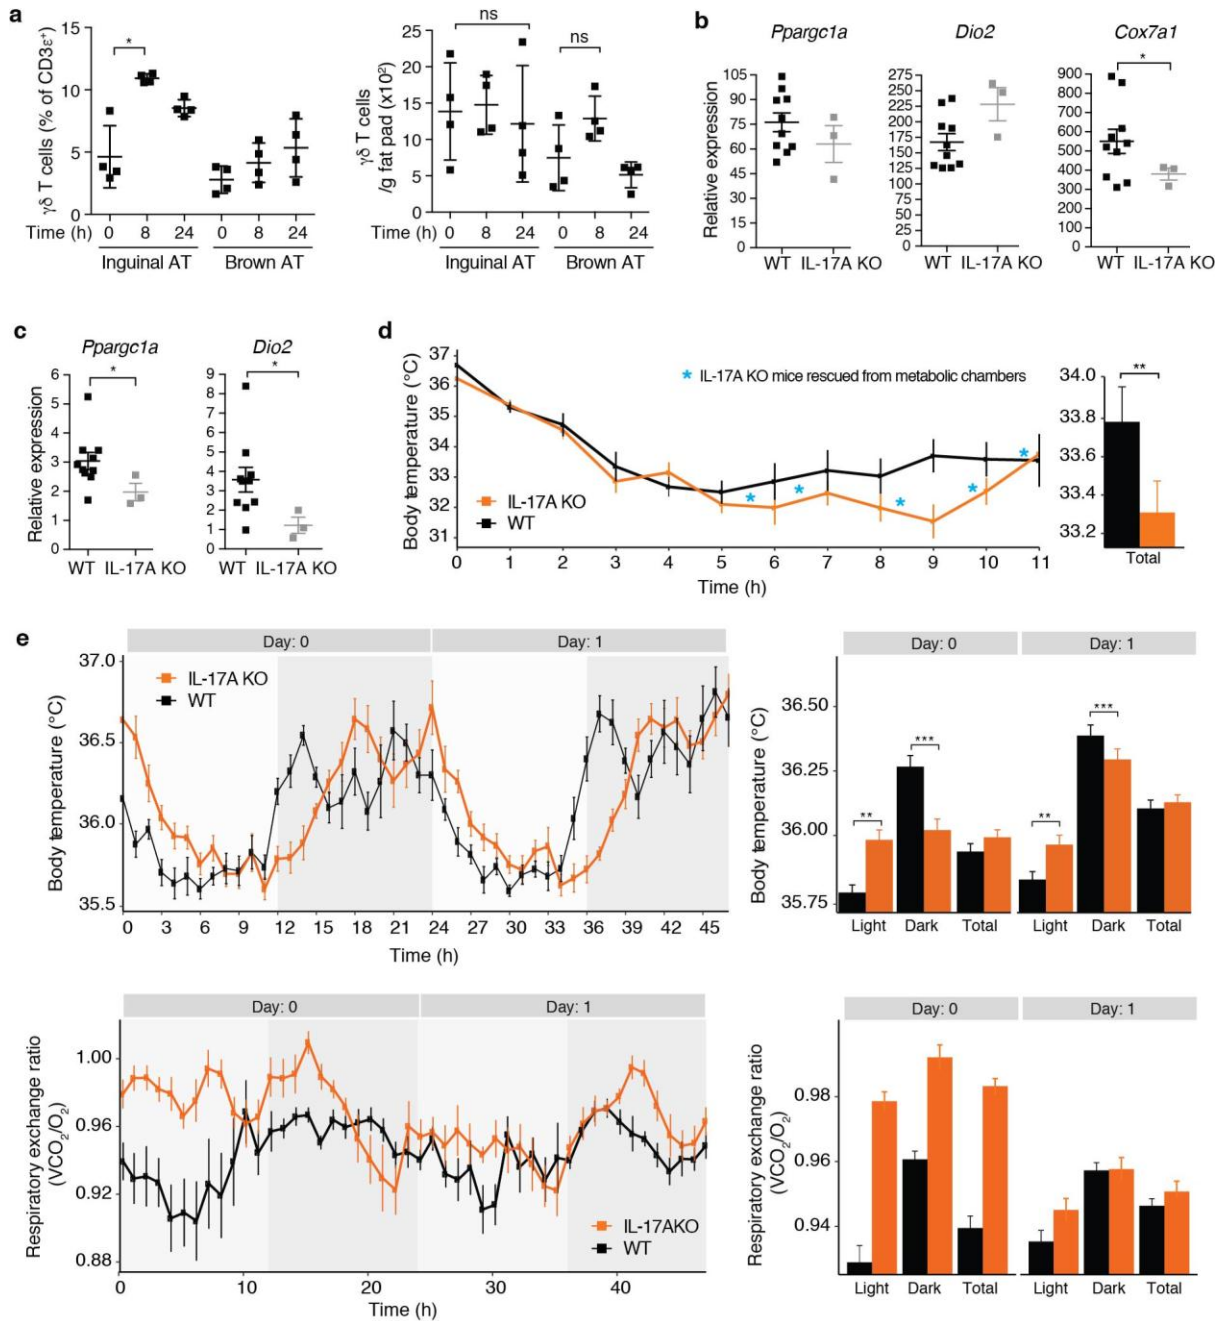

## Supplementary Figure 6

### IL-17A promotes thermogenic responses in BAT and iWAT

(a) Frequency (left) and numbers (right) of  $\gamma\delta$  T cells at 0, 8, and 24 h at 4 °C in BAT and iWAT ( $n \geq 3$  mice per condition). (b) Quantitative real-time PCR of *Ppargc1a*, *Dio2*, and *Cox7a1* normalized to *Tbp* in BAT between WT and *Il17a*<sup>-/-</sup> mice ( $n \geq 3$ ). (c) Quantitative real-time PCR of *Ppargc1a* and *Dio2* normalized to *Tbp* in iWAT between WT and *Il17a*<sup>-/-</sup> mice ( $n \geq 3$ ). (d) Mice were gradually shifted from 30 °C to 4 °C at a continuous rate and body temperature measured between WT and *Il17a*<sup>-/-</sup> male mice ( $n = 5$  mice per genotype). (e) Body temperature (top) and RER (bottom) measured for 72 h at thermoneutrality after acclimation between WT and *Il17a*<sup>-/-</sup> male mice ( $n = 5$  per genotype). Each symbol represents an individual mouse; small horizontal lines indicate the mean. NS, not significant ( $P > 0.05$ ); \*  $P < 0.05$ ; \*\*  $P < 0.01$ ; \*\*\*  $P < 0.001$ . (Student's *t* test in **b-c**; One-way ANOVA in **a**; Metabolic variable adjusted for differences in body composition by ANCOVA in **d-e**). Data are representative of two experiments (**a-c**; mean  $\pm$  s.e.m. in **a-c**).

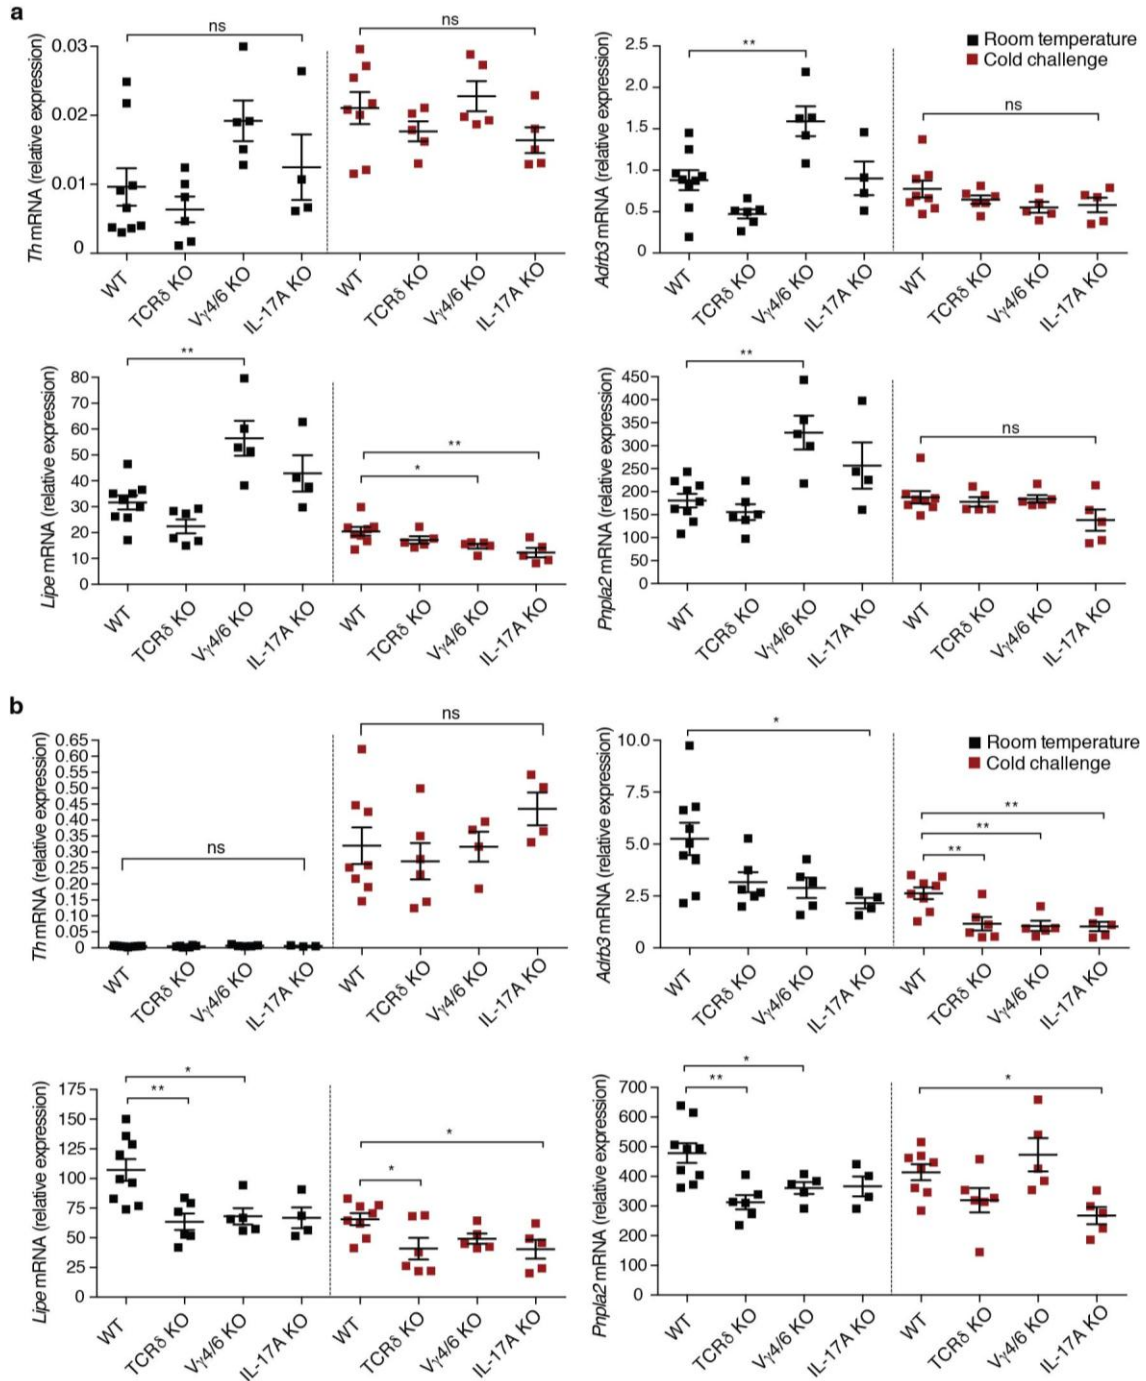

### Supplementary Figure 7

Gene expression analysis of BAT and iWAT

Quantitative real-time PCR of *Th*, *Adrb3*, *Lipe* (*Hsl*), and *Pnpla2* (*Atgl*) in brown (a) and inguinal (b) adipose tissue obtained from WT, *Tcrd*<sup>-/-</sup>, *Vg4/6*<sup>-/-</sup> and *Il17a*<sup>-/-</sup> mice at room temperature (25 °C) and after 6 h cold at 4 °C. Genes normalized to *Tbp* ( $n \geq 4$  mice per condition). Each symbol represents an individual mouse; small horizontal lines indicate the mean. NS, not significant ( $P > 0.05$ ); \*  $P < 0.05$ ; \*\*  $P < 0.01$ . (One-way ANOVA in a,b). Data are representative of two experiments (a,b; mean  $\pm$  s.e.m. in a,b).



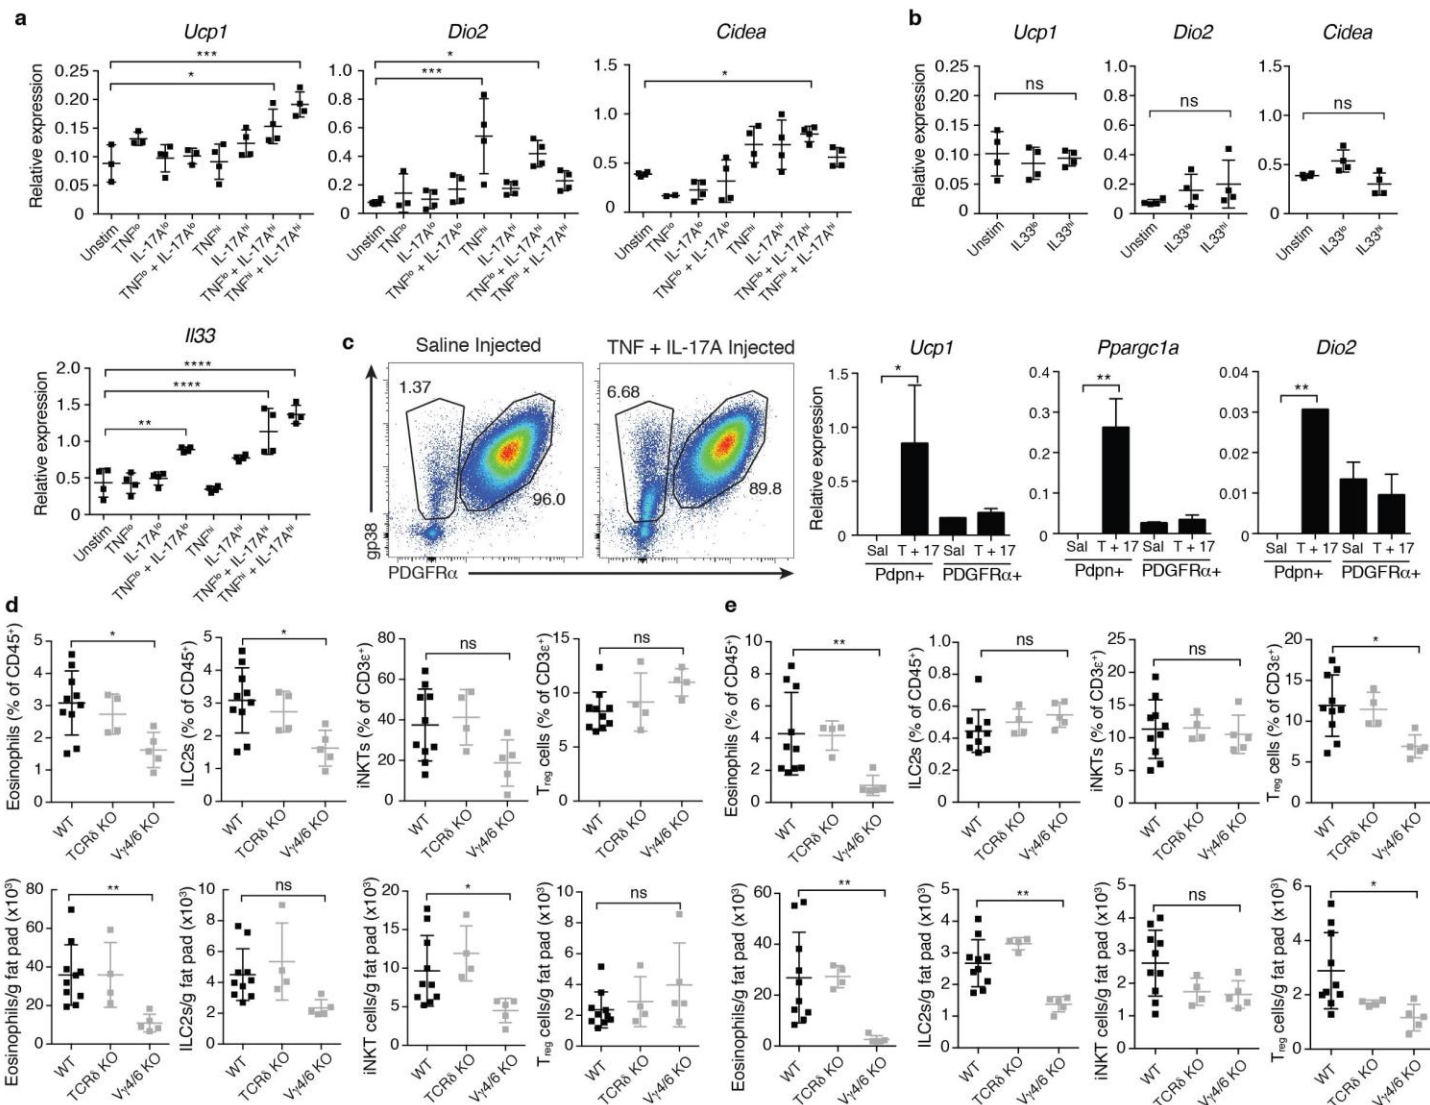

## Supplementary Figure 8

$\gamma\delta$  T cells directly and indirectly influence adaptive thermogenesis

(a) Differentiated brown adipocytes were stimulated with indicated amounts of TNF<sup>lo</sup> (0.1ng/mL), TNF<sup>hi</sup> (1ng/mL), IL-17A<sup>lo</sup> (0.1ng/mL), IL-17A<sup>hi</sup> (1ng/mL), for 18 h and *Ucp1*, *Dio2*, *Cidea*, and *Il33* transcript levels were measured by quantitative real-time PCR and normalized with *Tbp*. (b) Differentiated brown adipocytes were stimulated with either IL-33<sup>lo</sup> (10ng/mL), IL-33<sup>hi</sup> (100ng/mL), and analyzed as in a. (c) Representative flow cytometry plots (left) of iWAT stromal cells after WT mice were injected with saline (top row) or TNF (1 μg) and IL-17A (0.5 μg) every third day for a total of nine days. Pdpn<sup>+</sup>PDGFRα<sup>-</sup> and PDGFRα<sup>+</sup> iWAT stromal cells were sorted and gene expression of *Ucp1*, *Pparg1a*, and *Dio2* measured by quantitative real-time PCR and normalized with *Tbp* (n ≥ 3). Frequency (top) and numbers (bottom) of eosinophils, ILC2s, iNKT, and T<sub>reg</sub> cells from WT, *Tcrd*<sup>-/-</sup> and *Vg4/6*<sup>-/-</sup> brown (d) and inguinal (e) adipose tissue from 22 wk male mice (n ≥ 4 mice per group). Each symbol represents an individual replicate or mouse. Data are representative of two experiments (a-e; mean ± s.e.m. in a-e). NS, not significant (P > 0.05); \* P < 0.05; \*\* P < 0.01; \*\*\* P < 0.001; \*\*\*\* P < 0.0001. (One-way ANOVA in a-e).
